# Supplementary material for: Reverse charge transfer and decomposition in Ca–Te compounds under high pressure
Source: Royal Society of Chemistry journal article supplement (doi:10.1039/d3cp06209k), 2024-01-01
Supplement: d3cp06209k1.pdf [file d3cp06209k1.pdf]

## **Supplementary materials of “Reverse charge transfer and decomposition in Ca-Te compounds under high pressure”**

Yang Lv,<sup>1</sup> Jianfu Li,<sup>1,\*</sup> Zhaobin Zhang,<sup>1</sup> Yanlei Geng,<sup>1</sup> Zhenzhen Xu,<sup>1</sup> Yong Liu,<sup>1</sup> Jianan Yuan,<sup>1</sup> Qinglin Wang,<sup>2</sup> and Xiaoli Wang,<sup>1,\*</sup>

<sup>1</sup>School of Physics and Electronic Information, Yantai University, Yantai 264005, China

<sup>2</sup>Shandong Key Laboratory of Optical Communication Science and Technology, School of Physics Science & Information Technology, Liaocheng University, Liaocheng 252059, China

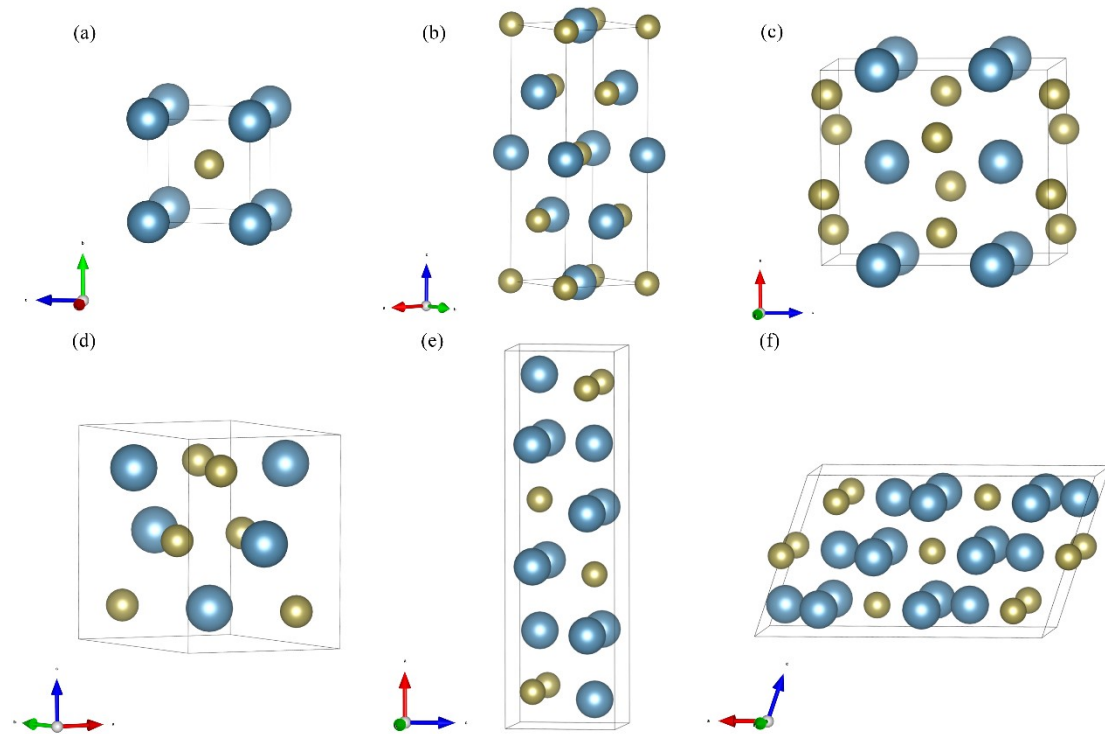

**Figure S1.** Predicted crystal structures. (a)  $Pm-3m$ , CaTe. (b)  $I41/amd$ , CaTe. (c)  $I4/mcm$ , CaTe. (d)  $P6422$ ,  $CaTe_2$  (e)  $Cmc$ ,  $Ca_2Te$ . (f)  $C2/m$ ,  $Ca_2Te$ .

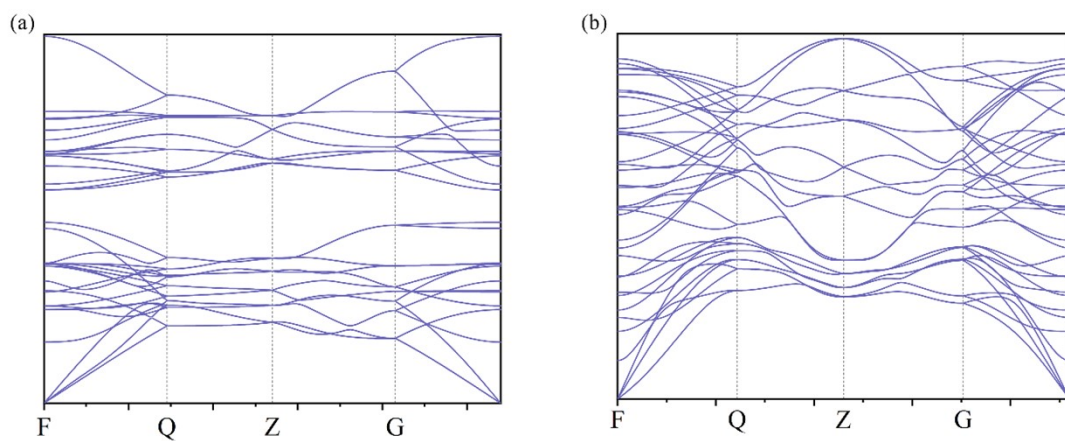

**Figure S2.** Calculated phonon dispersion curves. (a)  $I4/mcm$ ,  $CaTe_2$ . (b)  $Cmc$ ,  $Ca_2Te$ .

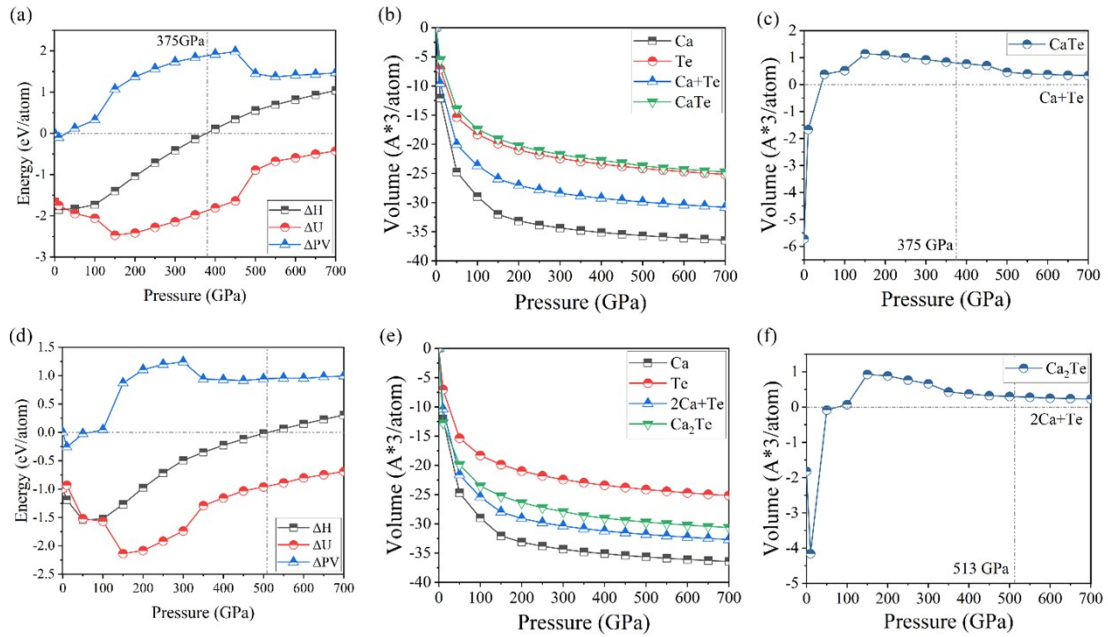

**Figure S3.** Electronic properties under different pressure. (a)  $\Delta H, \Delta U$ , and  $P\Delta V$  versus pressure for CaTe. (b) The volume of Ca elemental, Te elemental, Ca and Te mixture, and CaTe compound as a function of pressure. (c) The volume differences between the compound (CaTe) and Ca + Te. (d)  $\Delta H, \Delta U$ , and  $P\Delta V$  versus pressure for Ca<sub>2</sub>Te. (e) The volume of Ca elemental, Te elemental, Ca and Te mixture and Ca<sub>2</sub>Te compound as a function of pressure. (f) The volume differences between the compound (Ca<sub>2</sub>Te) and 2Ca + Te.

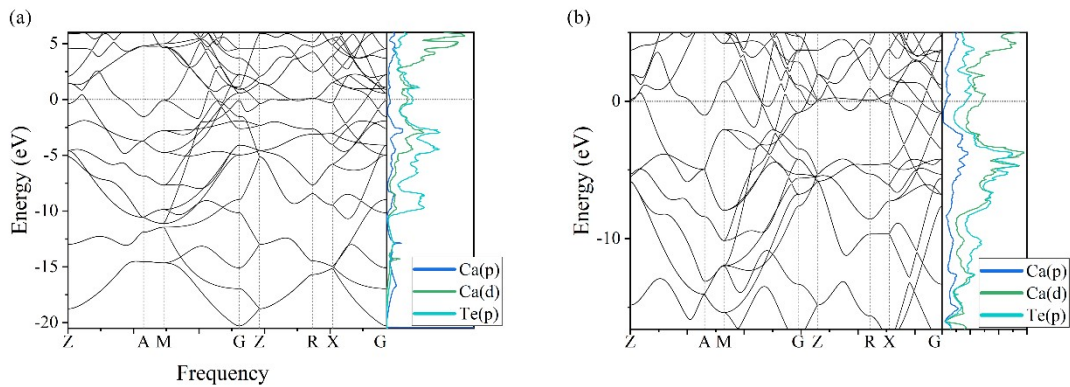

**Figure S4.** (a) Band and PDOS of CaTe<sub>2</sub> as the pressure of 200 GPa. (b) Band and PDOS of CaTe<sub>2</sub> as the pressure of 600 GPa.

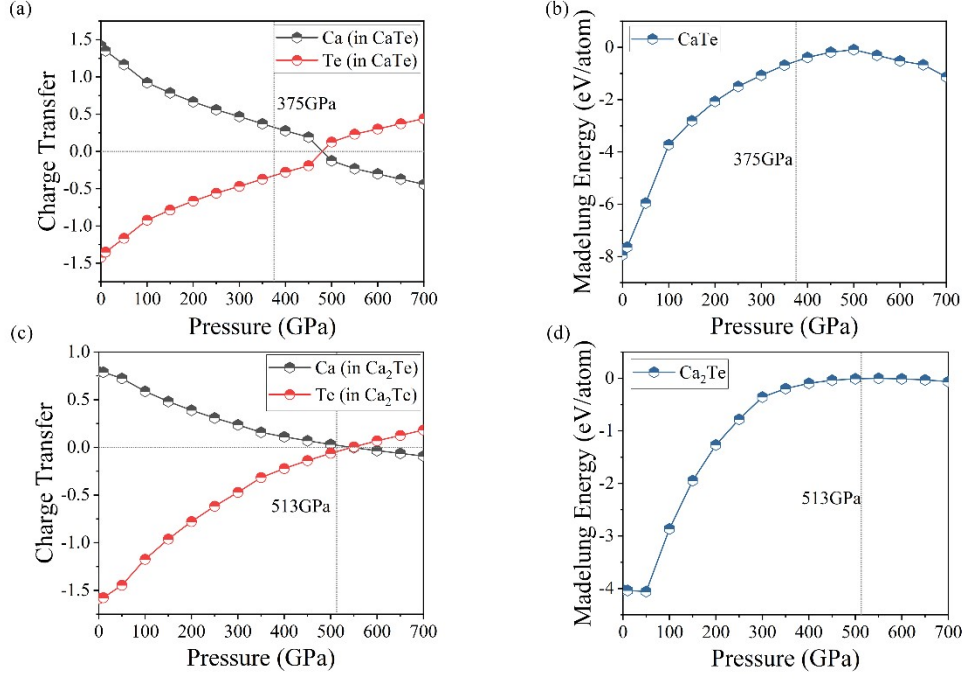

**Figure S5.** (a) The Bader charge of Ca and Te in CaTe. (b) The Madelung energy of CaTe. (c) The Bader charge of Ca and Te in Ca<sub>2</sub>Te. (d) The Madelung energy of Ca<sub>2</sub>Te.

**Table S1.**

Elastic constants (in GPa) of Ca<sub>2</sub>Te and criteria for elastic stability:

$$C_{ij}(Cmcm) = \begin{pmatrix} 83.746 & 17.642 & 16.844 & & & & \\ & 99.950 & 42.535 & & & & \\ & & 73.965 & & & & \\ & & & 13.604 & & & \\ & & & & 60.147 & & \\ & & & & & 37.177 & \\ & & & & & & \end{pmatrix}$$

1.  $C_{ii} > 0$
2.  $C_{11}C_{22} > C_{12}^2$
3.  $C_{11}C_{22}C_{33} + 2C_{12}C_{13}C_{23} - C_{11}C_{23}^2 - C_{22}C_{23}^2 - C_{33}C_{23}^2 > 0$

$$C_{ij}(C2/m) = \begin{pmatrix} 344.504 & 160.374 & 169.161 & & & & \\ & 327.674 & 150.465 & & & & \\ & & 485.416 & & & & \\ & & & 212.813 & & & \\ & & & & 107.916 & & \\ & & & & & 108.527 & \\ & & & & & & \end{pmatrix}$$

1.  $C_{ii} > 0$
2.  $D_1 = C_{11}C_{22} - C_{12}^2 > 0$
3.  $D_2 = C_{11}C_{33} - C_{13}^2 > 0$
4.  $D_3 = C_{22}C_{33} - C_{23}^2 > 0$
5.  $D_1D_2 - D_3^2 > 0$

Elastic constants (in GPa) of CaTe and criteria for elastic stability:

$$C_{ij}(I4_1amd) = \begin{pmatrix} 345.516 & 321.343 & 153.970 & & & -0.137 \\ & 345.907 & 154.163 & & & -0.190 \\ & & 422.047 & & & \\ & & & 285.495 & & \\ & & & & 149.229 & \\ & & & & & 148.102 \end{pmatrix}$$

1.  $C_{ii} > 0$
2.  $C_{11} > |C_{12}|$
3.  $2C_{12}^2 < C_{33}(C_{11} + C_{12})$
4.  $2C_{16}^2 < C_{66}(C_{11} - C_{12})$

Elastic constants (in GPa) of  $\text{CaTe}_2$  and criteria for elastic stability:

$$C_{ij}(I4/mcm) = \begin{pmatrix} 117.814 & 68.209 & 37.501 & & & -0.079 \\ & 117.692 & 37.422 & & & -0.098 \\ & & 86.575 & & & \\ & & & 62.748 & & \\ & & & & 41.637 & \\ & & & & & 41.645 \end{pmatrix}$$

1.  $C_{ii} > 0$
2.  $C_{11} > |C_{12}|$
3.  $2C_{12}^2 < C_{33}(C_{11} + C_{12})$
4.  $2C_{16}^2 < C_{66}(C_{11} - C_{12})$

$$C_{ij}(P6_422) = \begin{pmatrix} 279.084 & 114.123 & 97.945 & & & \\ & 277.267 & 97.817 & & & \\ & & 364.074 & & & \\ & & & 81.519 & & \\ & & & & 44.632 & \\ & & & & & 44.673 \end{pmatrix}$$

1.  $C_{ii} > 0$
2.  $C_{11} > |C_{12}|$
3.  $2C_{12}^2 < C_{33}(C_{11} + C_{12})$

$$C_{ij}(I4mmm) = \begin{pmatrix} 317.706 & 288.359 & 203.842 & & & \\ & 317.622 & 203.818 & & & \\ & & 435.733 & & & \\ & & & 298.109 & & \\ & & & & 200.860 & \\ & & & & & 199.287 \end{pmatrix}$$

1.  $C_{ii} > 0$
2.  $C_{11} > |C_{12}|$
3.  $2C_{12}^2 < C_{33}(C_{11} + C_{12})$

(a)

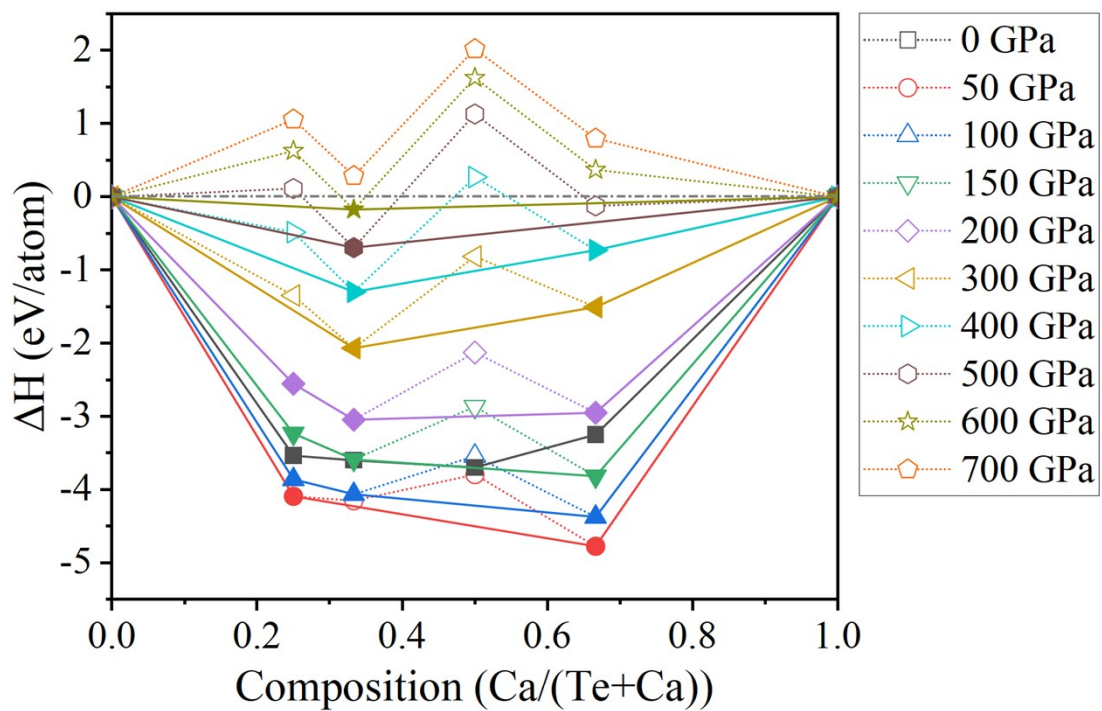

(b)

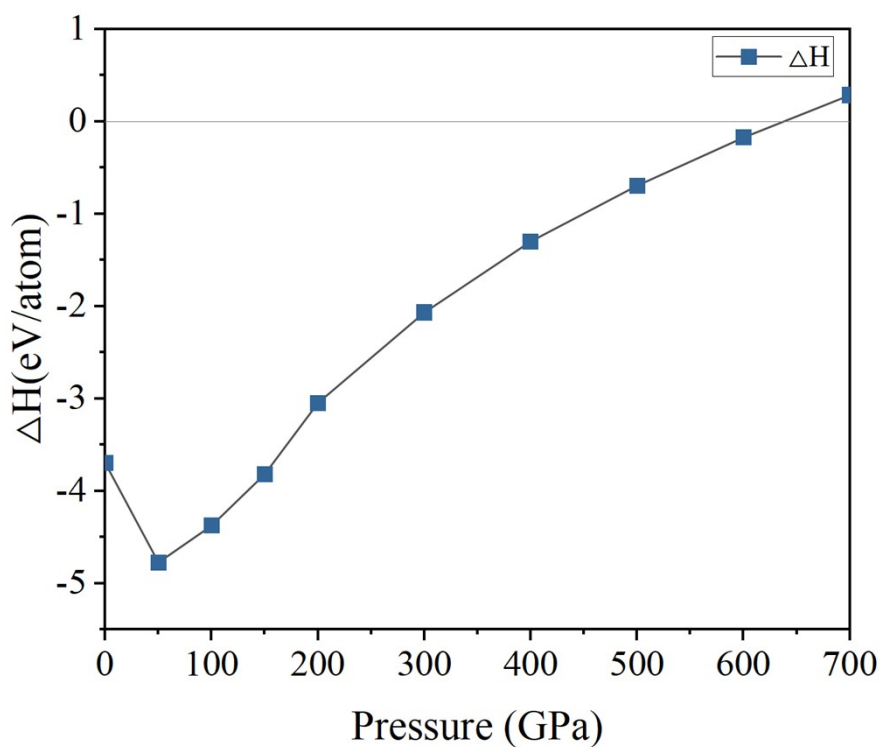

**Figure S6.** (a) Convex hull graph obtained by MetaGGA method. (b) The enthalpy of the most stable compound in the system as a function of pressure.

(a)

| <b>100 GPa</b>                   |               | <b>Bader Charge</b> | <b>Mulliken Charge</b> | <b>Loewdin Charge</b> |
|----------------------------------|---------------|---------------------|------------------------|-----------------------|
| <b>Charge</b>                    | <b>Ca (e)</b> | -0.8579             | 1.1588                 | 1.3075                |
|                                  | <b>Te (e)</b> | -0.4022             | -0.5813                | -0.6538               |
| <b>Madelung energy (eV/atom)</b> |               | -1.5468             | -2.8342                | -3.6008               |

(b)

| <b>600 GPa</b>                   |               | <b>Bader Charge</b> | <b>Mulliken Charge</b> | <b>Loewdin Charge</b> |
|----------------------------------|---------------|---------------------|------------------------|-----------------------|
| <b>Charge</b>                    | <b>Ca (e)</b> | -0.2443             | 0.7463                 | 1.1754                |
|                                  | <b>Te (e)</b> | -0.1222             | -0.3706                | -0.5877               |
| <b>Madelung energy (eV/atom)</b> |               | -0.1524             | -1.3970                | -3.4550               |

**Table S2.** (a) Charge transfer and Madelung energy calculated using three different methods under a pressure of 100 GPa, based on the hybrid functional HSE06. (b) Charge transfer and Madelung energy calculated using three different methods under a pressure of 600 GPa, based on the hybrid functional HSE06.
